# Supplementary material
Source: publisher figshare collection journal article supplement (https://plos.figshare.com/articles/dataset/_/4604731)
Supplement: Supplementary file [file 1]

# Supplementary information for Bigger Is Fitter? Quantitative Genetic Decomposition of Selection Reveals an Adaptive Evolutionary Decline of Body Mass in a Wild Rodent Population

Bonnet Timothée<sup>1,\*</sup>, Wandeler Peter<sup>1,2</sup>, Camenisch Glauco<sup>1</sup>, Postma Erik<sup>1,3</sup>

**1** Department of Evolutionary Biology and Environmental Studies, University of Zurich, Zurich, Switzerland

**2** Natural History Museum Fribourg, Fribourg, Switzerland

**3** Centre for Ecology and Conservation, College of Life and Environmental Sciences, University of Exeter, Cornwall Campus, Penryn, United Kingdom

\* timothee.bonnet@ieu.uzh.ch

**Table S1 Selection differentials (measuring total selection) and gradients (measuring direct selection only) for body mass, body length and tail length, when considered in the same selection analysis.**

| Trait       | Mean     | Standard deviation | Selection differential         | Selection gradient                               |
|-------------|----------|--------------------|--------------------------------|--------------------------------------------------|
| Body mass   | 41.7 g   | 5.3 g              | 0.85 g<br>95%CI [0.00; 1.95]   | 0.079 g <sup>-1</sup><br>95%CI [-0.084; 0.219]   |
| Body length | 115.4 mm | 4.5 g              | 1.23 mm<br>95%CI [-0.04; 2.45] | -0.026 mm <sup>-1</sup><br>95%CI [-0.151; 0.097] |
| Tail length | 55.6 mm  | 5.8 g              | 0.85 mm<br>95%CI [0.03; 1.85]  | 0.037 mm <sup>-1</sup><br>95%CI [-0.062; 0.131]  |

Means and standard deviations are given for adults. Selection parameters were obtained from a multi-variate animal model containing body mass in grams (g), body length in millimeters (mm) and tail length in mm as well as relative lifetime reproductive success as a measure of fitness. Credibility intervals should be interpreted with care because fitness was modelled as a Gaussian trait, in order to obtain meaningful selection parameters, while its distribution is closer to a Poisson distribution.
