# Supplementary material
Source: publisher figshare collection journal article supplement (https://plos.figshare.com/articles/dataset/_/4604731)

**Number of individuals**

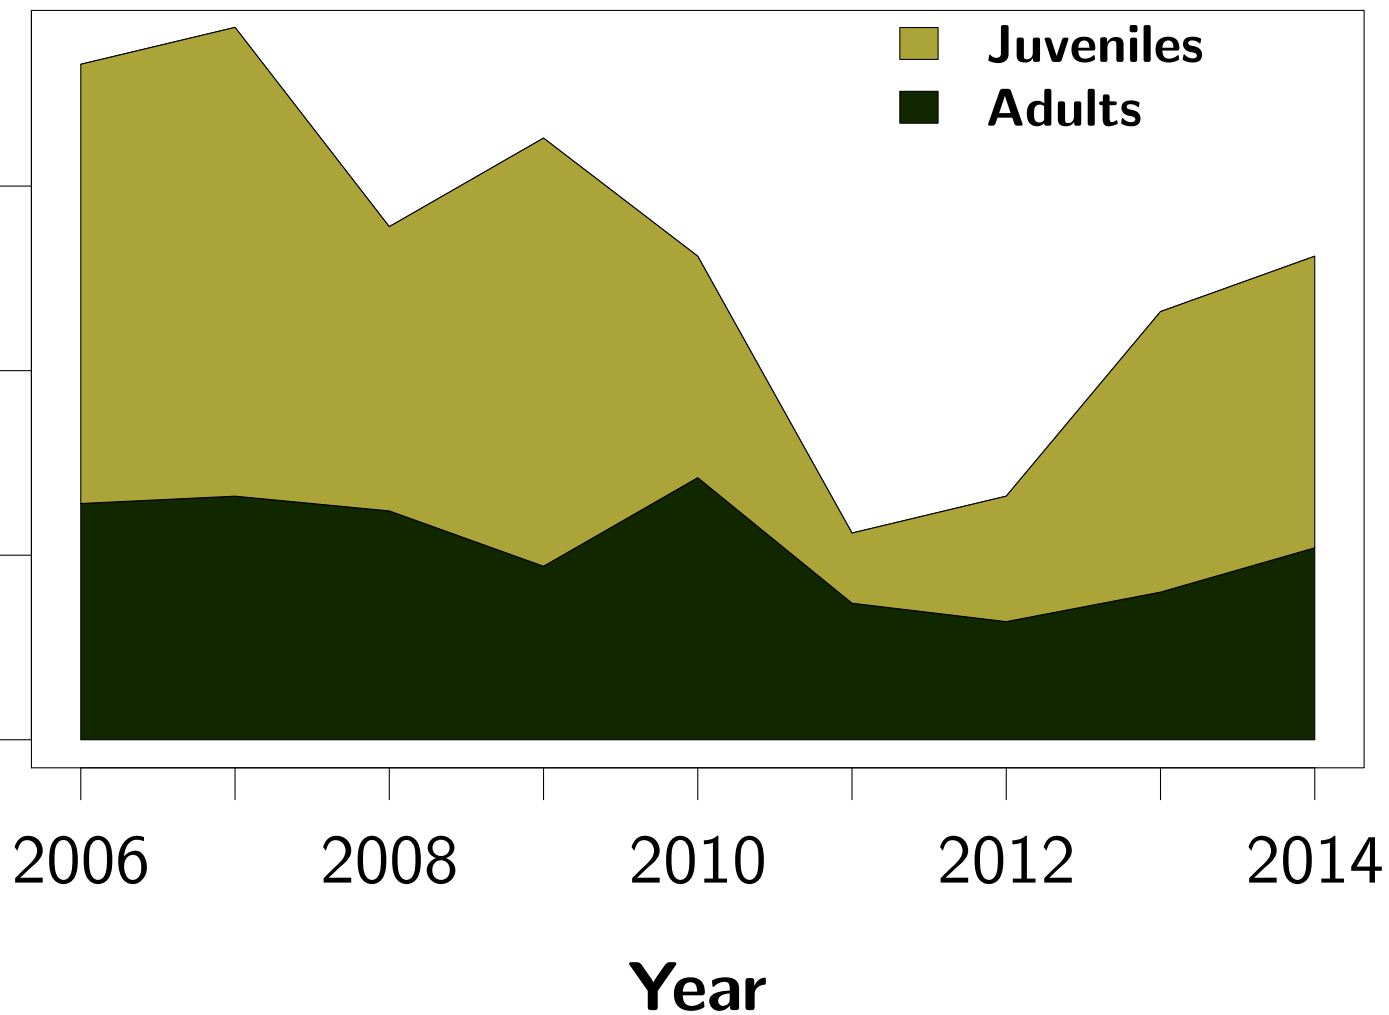

Supplement: Supplementary file [file 1]
